# Supplementary material for: Unwavering Pathobiology of Volumetric Muscle Loss Injury
Source: PubMed Central journal article supplement (PMC5640632; doi:10.1038/s41598-017-13306-2), 2017-10-13
Supplement: 41598_2017_13306_MOESM1_ESM.pdf [file 41598_2017_13306_MOESM1_ESM.pdf]

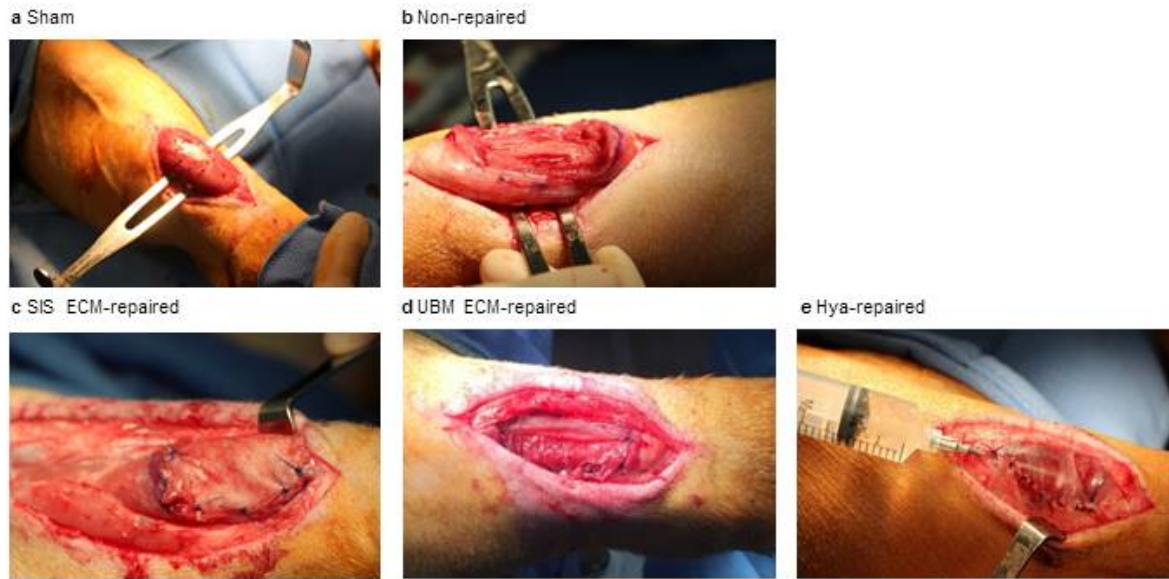

16  
 17  
 18  
 19  
 20  
 21  
 22  
 23

**Supplemental Figure 1** A VML injury was surgically created bilaterally in the porcine peroneous tertius (PT) muscle, the primary dorsiflexor muscle. Intraoperative picture of the VML procedure demonstrate the removal of ~5 g of muscle representing a ~3x3x1 cm area from the middle third of the PT muscle. Limbs were randomized to (a) sham VML procedures with the muscle remaining (b) non-repaired, or (c-e) the implantation of a biomaterial into the VML defect. Randomization also occurred for the biomaterial implanted, (c) SIS, (d) UBM, or (e) Hya.

24 **Supplemental Figure 2** Reliability of *in vivo* strength assessments. Muscle function was  
 25 determined by peroneal nerve stimulation *in vivo*, anterior muscle compartment torque was  
 26 analyzed prior to surgery for optimization and validation in a subset of animals (n=8).

27

28 Optimization of *in vivo* functional testing

| Joint Angle  | Right vs. Left<br>p-value | Limb order tested<br>p-value | Maximum vs. minimum<br>value<br>p-value |
|--------------|---------------------------|------------------------------|-----------------------------------------|
| 0° (neutral) | 0.942                     | 0.999                        | 0.202                                   |
| 10°          | 0.469                     | 0.999                        | 0.148                                   |
| 20°          | 0.198                     | 0.999                        | 0.632                                   |
| 30°          | 0.868                     | 0.999                        | 0.498                                   |
| 40°          | 0.943                     | 0.999                        | 0.584                                   |
| 50°          | 0.430                     | 0.999                        | 0.535                                   |

29 Data analyzed by one-way ANOVA

30

31 Variation of *in vivo* functional testing

| Joint Angle  | Mean Normalized Torque ± SE<br>(Nm/kg) | CV mean ± SE<br>(%) |
|--------------|----------------------------------------|---------------------|
| 0° (neutral) | 0.119 ± 0.006                          | 12.4 ± 4.0 *        |
| 10°          | 0.187 ± 0.009                          | 8.6 ± 2.0           |
| 20°          | 0.244 ± 0.009                          | 3.6 ± 1.4           |
| 30°          | 0.274 ± 0.009                          | 2.9 ± 0.7           |
| 40°          | 0.272 ± 0.008                          | 2.6 ± 0.7           |
| 50°          | 0.245 ± 0.008                          | 2.5 ± 1.2           |
| 55°          | 0.223 ± 0.010                          | --                  |

32 Torque is normalized to body weight; Data analyzed by one-way ANOVA (p=0.002;

33 \*significantly different than all other joint angles)

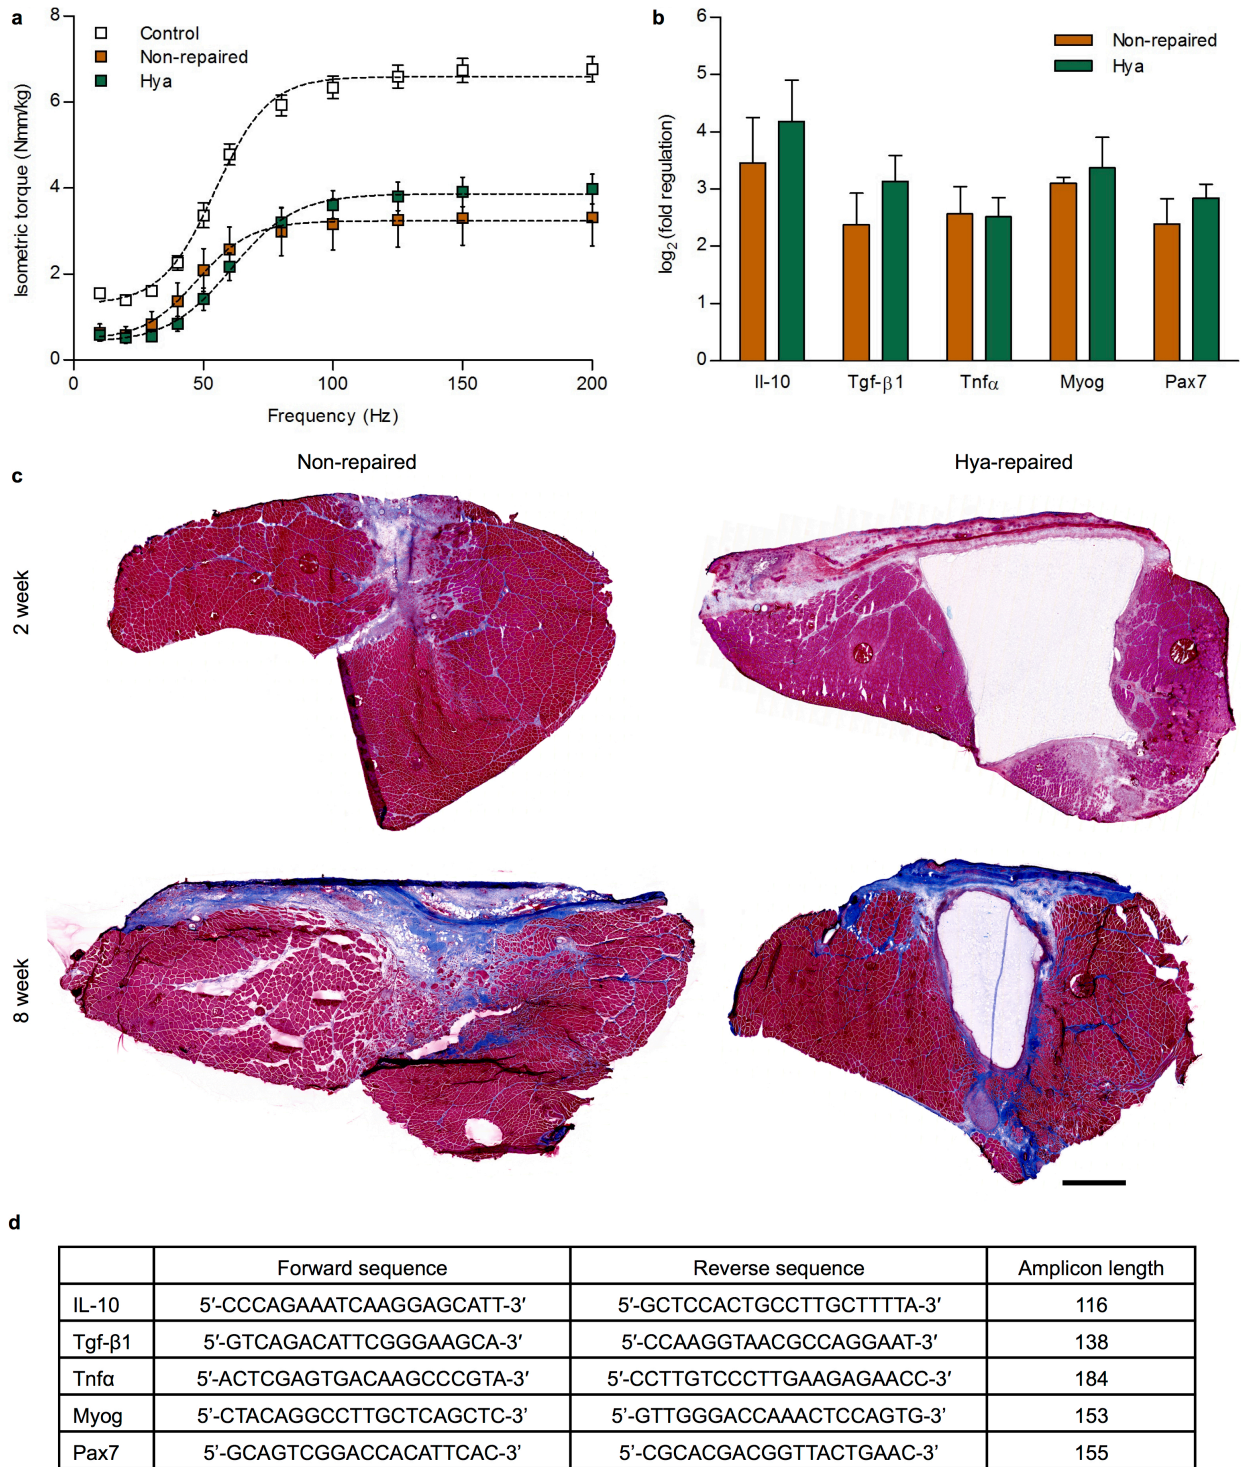

34  
 35 **Supplemental Figure 3** Hya repair does not orchestrate functional skeletal muscle tissue  
 36 regeneration in a rat TA VML injury model supporting use of Hya as a negative biomaterial  
 37 control for analysis in the porcine PT VML injury. **(a)** *In vivo* torque-frequency relationship of  
 38 the isolated TA muscle for contralateral control (n=7), non-repaired (n=3), and Hya-repaired  
 39 (n=7) at 8 weeks post-injury. There is a persistent strength deficit in the non-repaired muscles,

40 that is not significantly different than that of the Hya-repaired muscles across stimulation  
41 frequencies ( $p \geq 0.165$ ). **(b)** Gene expression of inflammatory cytokine and myogenic  
42 transcription factors was analyzed at 2 weeks post-injury in the injured TA muscle relative to the  
43 contralateral limb ( $n=3$  per transcript). There was similar upregulation of genes in the non- and  
44 Hya-repaired TA muscles ( $p \geq 0.421$ ). **(c)** Representative histologic evaluation of Masson's  
45 trichrome muscle sections do not display any evidence of muscle tissue regeneration in the defect  
46 area of the TA muscle. Of note there is expected degradation of the Hya from 2 to 8 weeks post-  
47 injury. Scale bar is 1 mm. **(d)** Primer sequences used for transcript analysis.

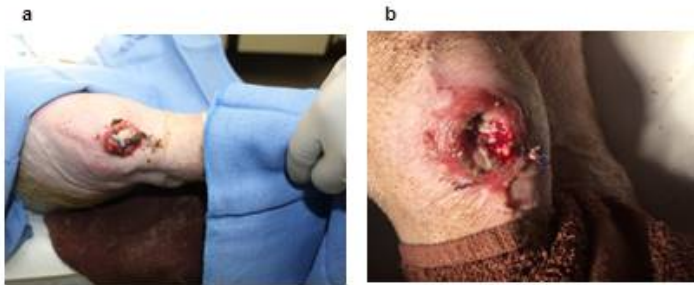

c Noteworthy adverse events

|                                                             | Sham<br>n=2 | Non-repaired<br>n=12 | SIS<br>n=5 | UBM<br>n=4 | Hya<br>n=3 |
|-------------------------------------------------------------|-------------|----------------------|------------|------------|------------|
| Prolonged inflammation                                      | 0           | 0                    | 5          | 0          | 0          |
| Wound dehiscence                                            | 0           | 1                    | 3          | 0          | 0          |
| Erosion                                                     | 0           | 0                    | 1          | 0          | 0          |
| Seroma                                                      | 0           | 0                    | 4          | 0          | 0          |
| Additional pain and/or anti-inflammatory medication needed  | 0           | 0                    | 4          | 0          | 0          |
| Loss of biomaterial components and/or ECM explant necessary | NA          | NA                   | 3          | 0          | 0          |

48  
 49 **Supplemental Figure 4** SIS repair presented wound healing complications. (a) At the 2 week  
 50 function check the bandage was removed and the ECM was completely exposed where the  
 51 implanted material eroded through the skin lateral to the surgical incision. The wound was  
 52 debrided, irrigated, and the limb was re-banded. (b) Three days later the bandage was removed  
 53 to again address the wound. At this point the wound was still open and there were noted signs of  
 54 inflammation. Again the wound was debrided, irrigated, at this point the remaining SIS was  
 55 completely removed, and the limb was re-banded. (c) All noteworthy adverse events that  
 56 occurred in the present study are noted; n's listed represent totals included for the study.  
 57

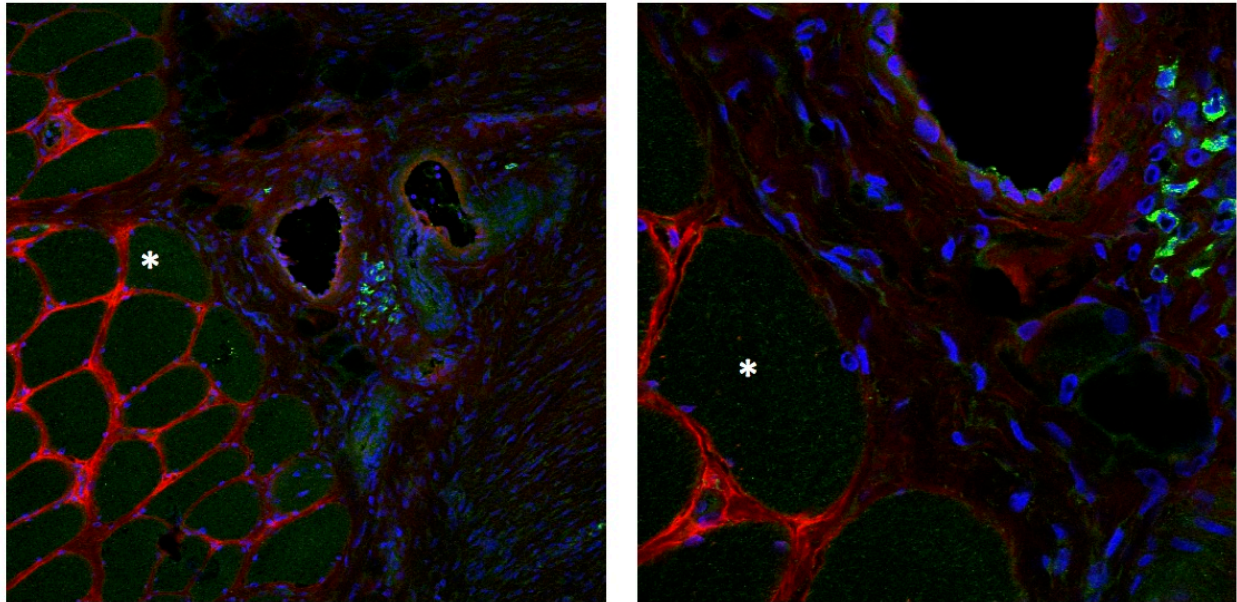

58  
59 **Supplemental Figure 5** Pax7 positive cell clusters in close proximity to remaining muscle mass.  
60 Pax7 positive cells were observed in two muscles repaired with SIS. The clusters were in close  
61 proximity the remaining muscle mass and not observed further in the defect area. The left (scale  
62 bar = 200  $\mu\text{m}$ ) and right (scale bar = 100  $\mu\text{m}$ ) panel are derived from the same muscle at the  
63 interface of the remaining muscle mass and the defect area. \* demarks the same muscle fiber in  
64 each panel. Pax7, green; WGA, red; DAPI, blue.  
65

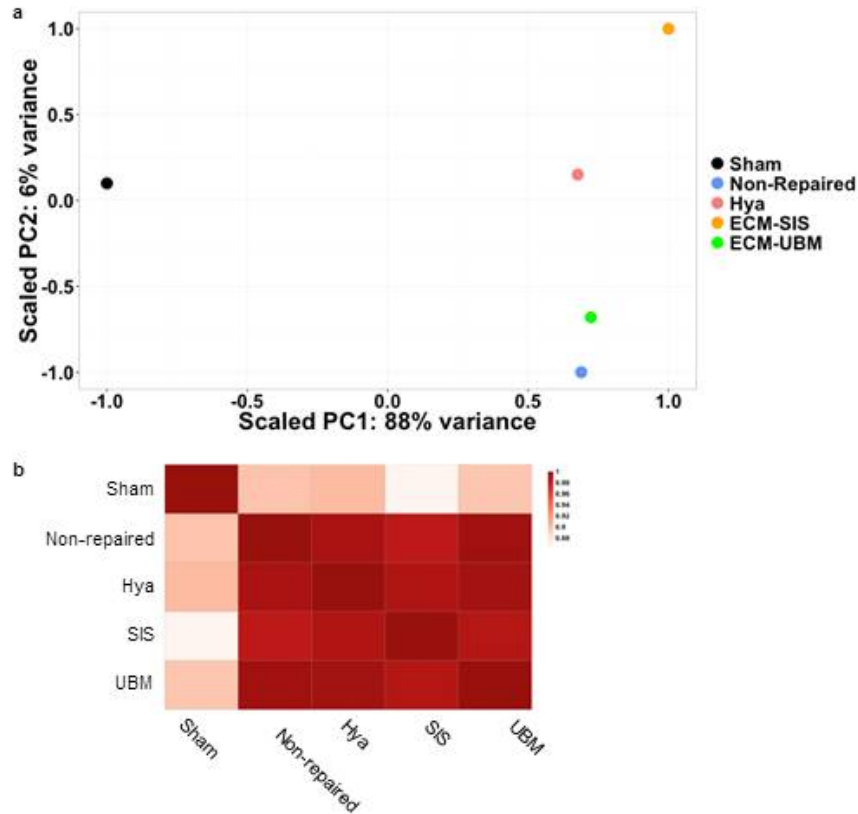

66  
 67 **Supplemental Figure 6** Transcriptional analysis indicated that healthy muscle (sham operated)  
 68 was extensively dissimilar than those of VML injured or repaired muscles. **(a)** Principal  
 69 component analysis (PCA) of transcriptome analyses shows significant separation of the sham  
 70 tissues with those that were VML injured, regardless of repair. **(b)** Pearson correlation  
 71 coefficient matrix of tissue transcriptomes for both uninjured and VML injured regardless of  
 72 treatment.  
 73
